# Supplementary material for: A highly selective molecularly imprinted electrochemical sensor with anti-interference based on GO/ZIF-67/AgNPs for the detection of p-cresol in a water environment
Source: Royal Society of Chemistry journal article supplement (doi:10.1039/d2ay00911k), 2022-01-01
Supplement: d2ay00911k1.pdf [file d2ay00911k1.pdf]

## Supplementary Material

### Highly selective molecularly imprinted electrochemical sensor with anti-interference based on GO/ZIF-67/AgNPs for the detection of p-cresol in water environment

Shuang Han<sup>a</sup>, Ruonan Sun<sup>a</sup>, Fu Teng<sup>a</sup>, Yuan Wang<sup>b</sup>, Hongtao Chu<sup>a</sup>, Wei Zong<sup>a</sup>, Yao Chen<sup>b</sup>, Zhonghui Sun<sup>b</sup>

<sup>a</sup>College of Chemistry and Chemical Engineering, Qiqihar University, Qiqihar 161006, China.

<sup>b</sup>Heilongjiang Province Qiqihar ecological environment monitoring center, Qiqihar 161005, China.

\*Corresponding Author E-mail: [iamhanshuang1982@163.com](mailto:iamhanshuang1982@163.com),

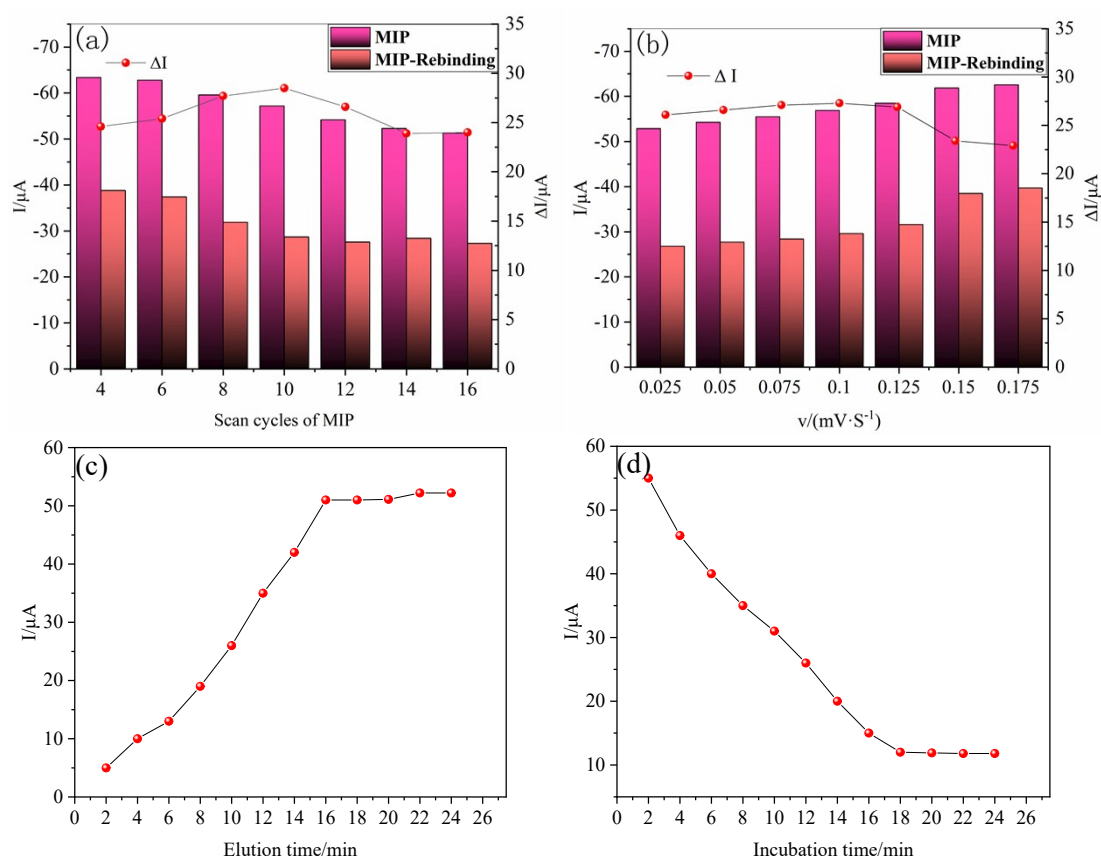

**Fig. S1 Optimization of factors affecting the performance of the p-cresol-MIECS : cycles number (a), scan rates (b), elution time (c) and incubation time (d).**

\* Corresponding author. Tel: +86 452 2738214.

Email address: [iamhanshuang1982@163.com](mailto:iamhanshuang1982@163.com) (S. Han)

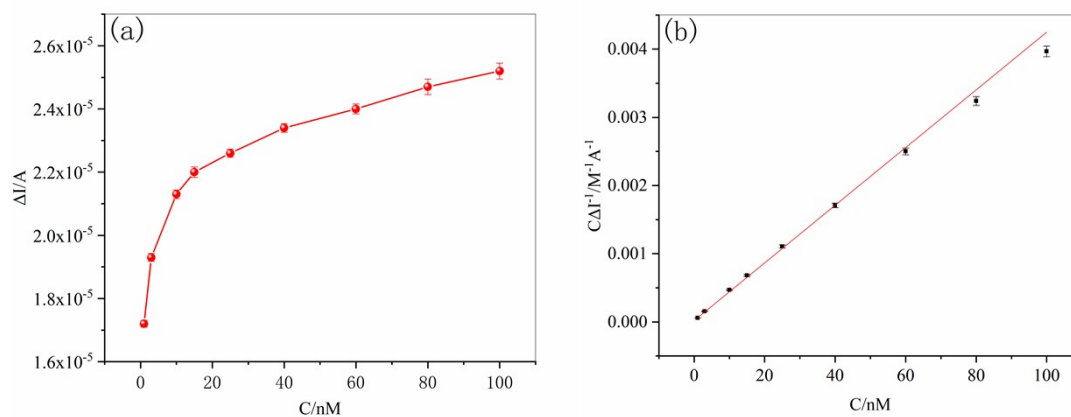

**Fig. S2 Analytical curves of the MIP/GO/ZIF-67/AgNPs/GCE sensor in different p-cresol concentrations (a) and linearization of the Langmuir adsorption isotherm for the MIP/GO/ZIF-67/AgNPs/GCE sensor ( $n = 3$ ) (b).**

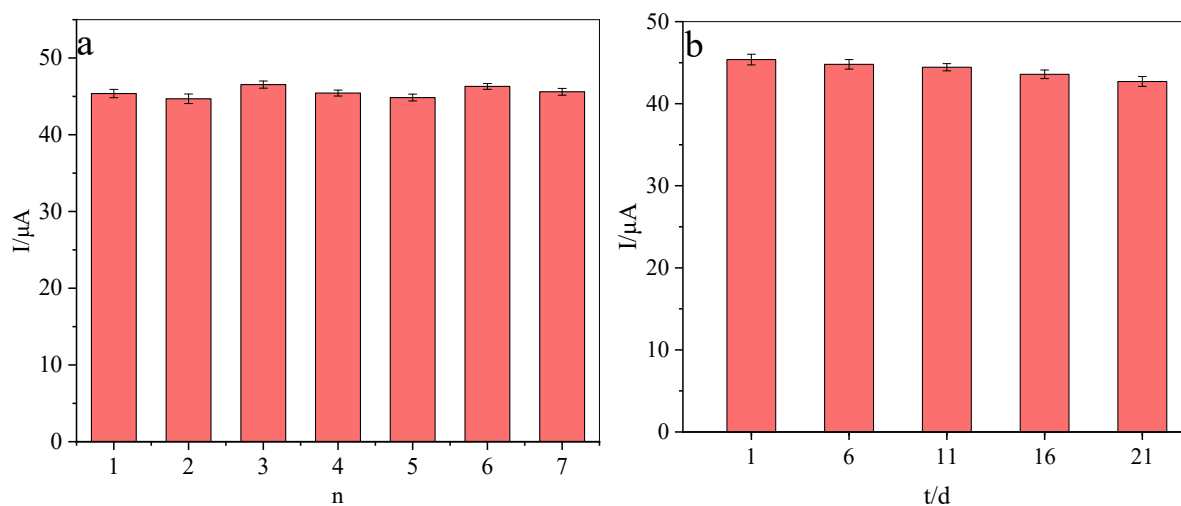

**Fig.S3 Reproducibility (a) and stability (b) of p-cresol-MIECS**
